# Supplementary material
Source: MDPI journal article supplement (https://www.mdpi.com/search?q=materials-12-01208)
Supplement: s001 [file materials-12-01208-s001.pdf]

Article

# A Pragmatic Bilayer Selective Emitter for Efficient Radiative Cooling under Direct Sunlight

Yiwei Liu <sup>1,2,3</sup>, Anqi Bai <sup>1,2,3</sup>, Zhenggang Fang <sup>1,2,3,\*</sup>, Yaru Ni <sup>1,2,3,4,\*</sup>, Chunhua Lu <sup>1,2,3,\*</sup> and Zhongzi Xu <sup>1,2,3</sup>

- <sup>1</sup> State Key Laboratory of Materials-Oriented Chemical Engineering, College of Materials Science and Engineering, Nanjing Tech University, Nanjing 210009, China; 2452615070@njtech.edu.cn (Y.L.); aqbai@njtech.edu.cn (A.B.); zzxu@njtech.edu.cn (Z.X.)
  - <sup>2</sup> Jiangsu Collaborative Innovation Center for Advanced Inorganic Function Composites, Nanjing Tech University, Nanjing 210009, China
  - <sup>3</sup> Jiangsu National Synergetic Innovation Center for Advanced Materials (SICAM), Nanjing Tech University, Nanjing 210009, China
  - <sup>4</sup> Key Laboratory of MEMS of Ministry of Education, Southeast University, Nanjing 210096, China
- \* Correspondence: zgfang@njtech.edu.cn (Z.F.); nyr@njtech.edu.cn (Y.N.); chhlu@njtech.edu.cn (C.L.)

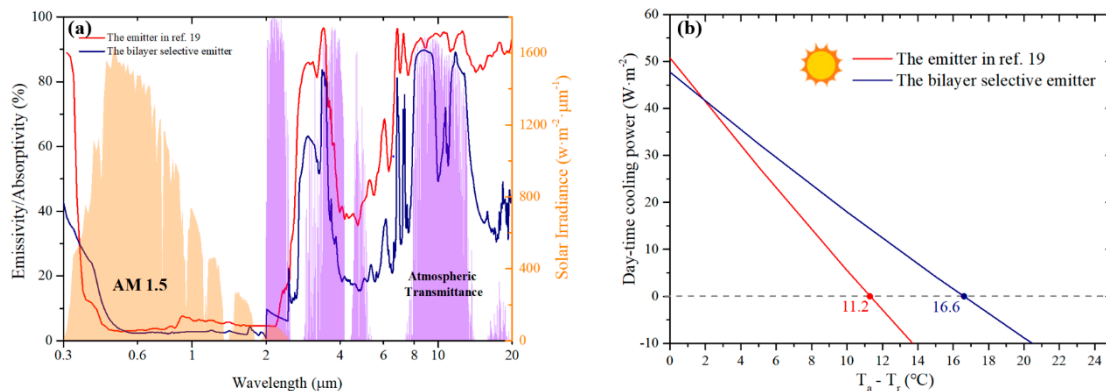

**Figure S1.** the comparison of (a) the solar and IR emissivity/absorptivity and (b) the day-time cooling power between between the bilayer selective emitter and a selective emitter in ref. [19].
